# Supplementary material for: Comparative Evaluation of a 28-Gene versus 70-Gene Panel for Recurrence Risk Prediction in Early-Stage HR-Positive/HER2-Negative Breast Cancer in Chinese Women
Source: Research Square preprint supplement (doi:10.21203/rs.3.rs-6832631/v1), 2025-07-01
Supplement: Supplementary file 1 [file 437564838430f0a80c91b8bd.docx]

**Table S1. Clinical and pathological characteristics and differences between high-risk and low-risk patients by 28-gene assay (RI-DR).**

| Characteristic | | RI-DR low-risk | RI-DR high-risk | P-Value |
| --- | --- | --- | --- | --- |
| (N =88) | (N=11) |
| Age (Mean ± SD) | | 53.53 ± 8.94 | 49.8 ± 10.92 | 0.089 |
| Tumor stage | T1 | 50 (68.5%) | 10 (38.5%) | 0.011 |
| T2 | 23 (31.5%) | 15 (57.7%) |
| T3 | 0 (%) | 1 (3.8%) |
| Nodal stage | N0 | 52 (71.2%) | 11 (42.3%) | 0.046 |
| N1 | 21 (28.8%) | 15 (57.7%) |
| Grade | 1 | 11 (15.1%) | 1 (3.8%) | < 0.001 |
| 2 | 60 (82.2%) | 16 (61.5%) |
| 3 | 2 (2.7%) | 9 (34.6%) |
| LVI | Absent | 66 (90.4%) | 13 (50%) | < 0.001 |
| Present | 7 (9.6%) | 13 (50%) |
| Progesterone Receptor | Positive | 53 (72.6%) | 21 (80.8%) | 0.713 |
| Negative | 16 (21.9%) | 4 (15.4%) |
| NA | 4 (5.5%) | 1 (3.8%) |
| Ki-67 | ＜10% | 20 (27.4%) | 2 (7.7%) | 0.008 |
| 10% - 30% | 45 (61.6%) | 15 (57.7%) |
| ＞30% | 8 (11%) | 9 (34.6%) |
| Chemotherapy | No | 36 (49.3%) | 6 (23.1%) | < 0.001 |
| Yes | 20 (27.4%) | 19 (73%) |
| NA | 17 (23.3%) | 1 (3.8%) |

RI-DR, recurrence index for distant recurrence; SD, standard deviation; LVI, lymphovascular invasion.
