# Supplementary material for: Comparative Evaluation of a 28-Gene versus 70-Gene Panel for Recurrence Risk Prediction in Early-Stage HR-Positive/HER2-Negative Breast Cancer in Chinese Women
Source: Research Square preprint supplement (doi:10.21203/rs.3.rs-6832631/v1), 2025-07-01
Supplement: Supplementary file 2 [file 454fb30a724349e7fadb79e6.docx]

**Table S2. Clinical and pathological characteristics and differences between high-risk and low-risk patients by 28-gene assay (RI-LR).**

| Characteristic | | RI-LR low-risk | RI-LR high-risk | P-Value |
| --- | --- | --- | --- | --- |
| (n = 88) | (n = 11) |
| Age (Mean ± SD) | | 53.17 ± 9.31 | 47.64 ± 10.74 | 0.071 |
| Tumor stage | T1 | 55 (62.5%) | 5(45.5%) | 0.488 |
| T2 | 32 (36.4%) | 6 (54.5%) |
| T3 | 1 (1.1%) | 0 |
| Nodal stage | N0 | 59 (67.0%) | 4 (36.4%) | 0.236 |
| N1 | 29(32.9%) | 7(63.6%) |
| Grade | 1 | 12 (13.6%) | 0 | 0.109 |
| 2 | 68 (77.3%) | 8 (72.7%) |
| 3 | 8 (9.1%) | 3 (27.3%) |
| LVI | Absent | 72 (81.8%) | 7 (63.6%) | 0.225 |
| Present | 16 (18.2%) | 4 (36.4%) |
| Progesterone Receptor | Positive | 66 (75%) | 8 (72.7%) | 0.806 |
| Negative | 18 (20.5%) | 2 (18.2%) |
| NA | 4 (4.5%) | 1 (9.1%) |
| Ki-67 | ＜10% | 22 (25.0%) | 0 | 0.066 |
| 10% - 30% | 53 (60.2%) | 7 (63.6%) |
| ＞30% | 13 (14.8%) | 4 (36.4%) |
| Chemotherapy | No | 42 (47.7%) | 0 | <0.001 |
| Yes | 28 (31.8%) | 11(100%) |
| NA | 18 (20.5%) | 0 |

RI-LR, recurrence index for local recurrence; SD, standard deviation; LVI, lymphovascular invasion.
