# Supplementary material for: Comparative Evaluation of a 28-Gene versus 70-Gene Panel for Recurrence Risk Prediction in Early-Stage HR-Positive/HER2-Negative Breast Cancer in Chinese Women
Source: Research Square preprint supplement (doi:10.21203/rs.3.rs-6832631/v1), 2025-07-01
Supplement: Supplementary file 3 [file 92b39ae202f70c4b8411e633.docx]

**Table S3. Clinical and pathological characteristics and differences between high-risk and low-risk patients by 70-gene assay.**

| Characteristic | | 70-gene low-risk | 70-gene high-risk | P-Value |
| --- | --- | --- | --- | --- |
| (n = 65) | (n = 34) |
| Age (Mean ± SD) | | 52.82 ± 9.68 | 52.06 ± 9.51 | 0.371 |
| Tumor stage | T1 | 42 (64.6%) | 18 (52.9%) | 0.361 |
| T2 | 22 (33.8%) | 16 (47.1%) |
| T3 | 1 (1.5%) | 0 (%) |
| Nodal stage | N0 | 41 (63.1%) | 22 (64.7%) | 0.523 |
| N1 | 24 (37%) | 12 (35.3%) |
| Grade | 1 | 10 (15.4%) | 2 (5.9%) | 0.001 |
| 2 | 53 (81.5%) | 23 (67.6%) |
| 3 | 2 (3.1%) | 9 (26.5%) |
| LVI | Absent | 56 (86.2%) | 23 (67.6%) | 0.037 |
| Present | 9 (13.8%) | 11 (32.4%) |
| Progesterone Receptor | Positive | 50 (76.9%) | 24 (70.6%) | 0.789 |
| Negative | 12 (18.5%) | 8(23.5%) |
| NA | 3 (4.6%) | 2 (5.9%) |
| Ki-67 | ＜10% | 21 (32.3%) | 1 (2.9%) | <0.001 |
| 10% - 30% | 41 (63.1%) | 19 (55.9%) |
| ＞30% | 3 (4.6%) | 14 (41.2%) |
| Chemotherapy | No | 40 (61.5%) | 2 (5.9%) | <0.001 |
| Yes | 8 (12.3%) | 31 (91.2%) |
| NA | 17 (26.2%) | 1 (2.9%) |

SD, standard deviation; LVI, lymphovascular invasion.
