# Supplementary figures and images for: Comparative Evaluation of a 28-Gene versus 70-Gene Panel for Recurrence Risk Prediction in Early-Stage HR-Positive/HER2-Negative Breast Cancer in Chinese Women
Source: Research Square preprint supplement (doi:10.21203/rs.3.rs-6832631/v1), 2025-07-01

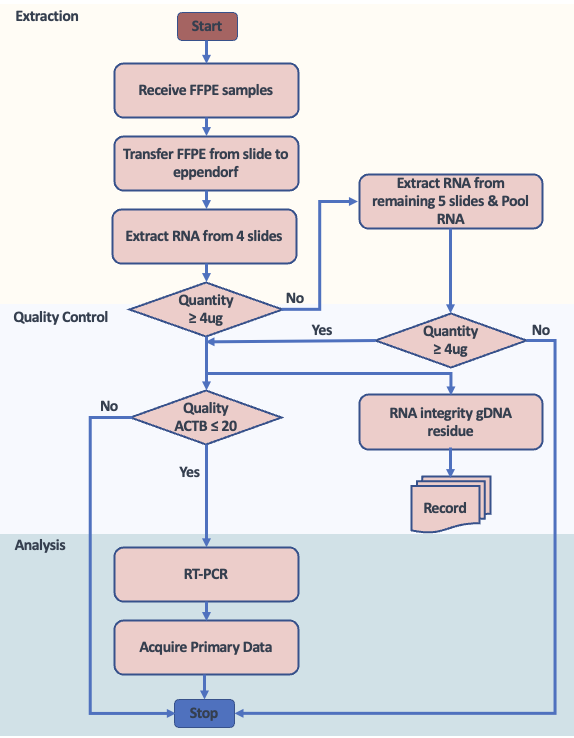


**Figure S1. 28-Gene testing laboratory related operations and quality control requirements.**

Supplement: Supplementary file 4 [file b7eef145f272e6c0311d01c8.docx]
